# Supplementary material for: Meta-analyses of genome wide association studies in lines of laying hens divergently selected for feather pecking using imputed sequence level genotypes
Source: Springer Nature journal article supplement (doi:10.1186/s12863-020-00920-9), 2020-10-01
Supplement: MOESM3 [file 12863_2020_920_MOESM3_ESM-1.pdf]

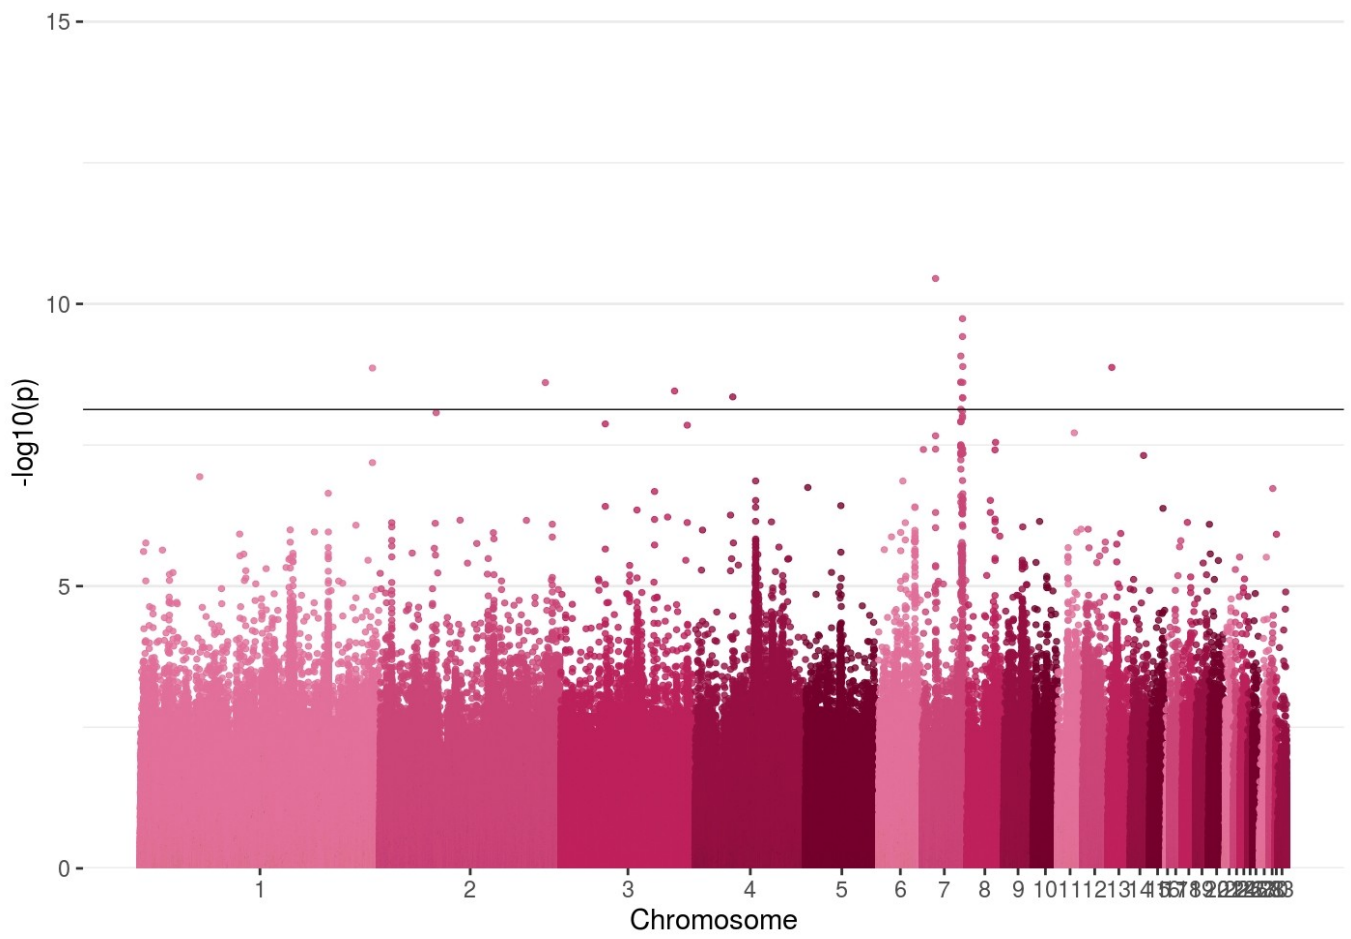

Manhattan plot of GWAS with the F2 population performed with the trait FPD

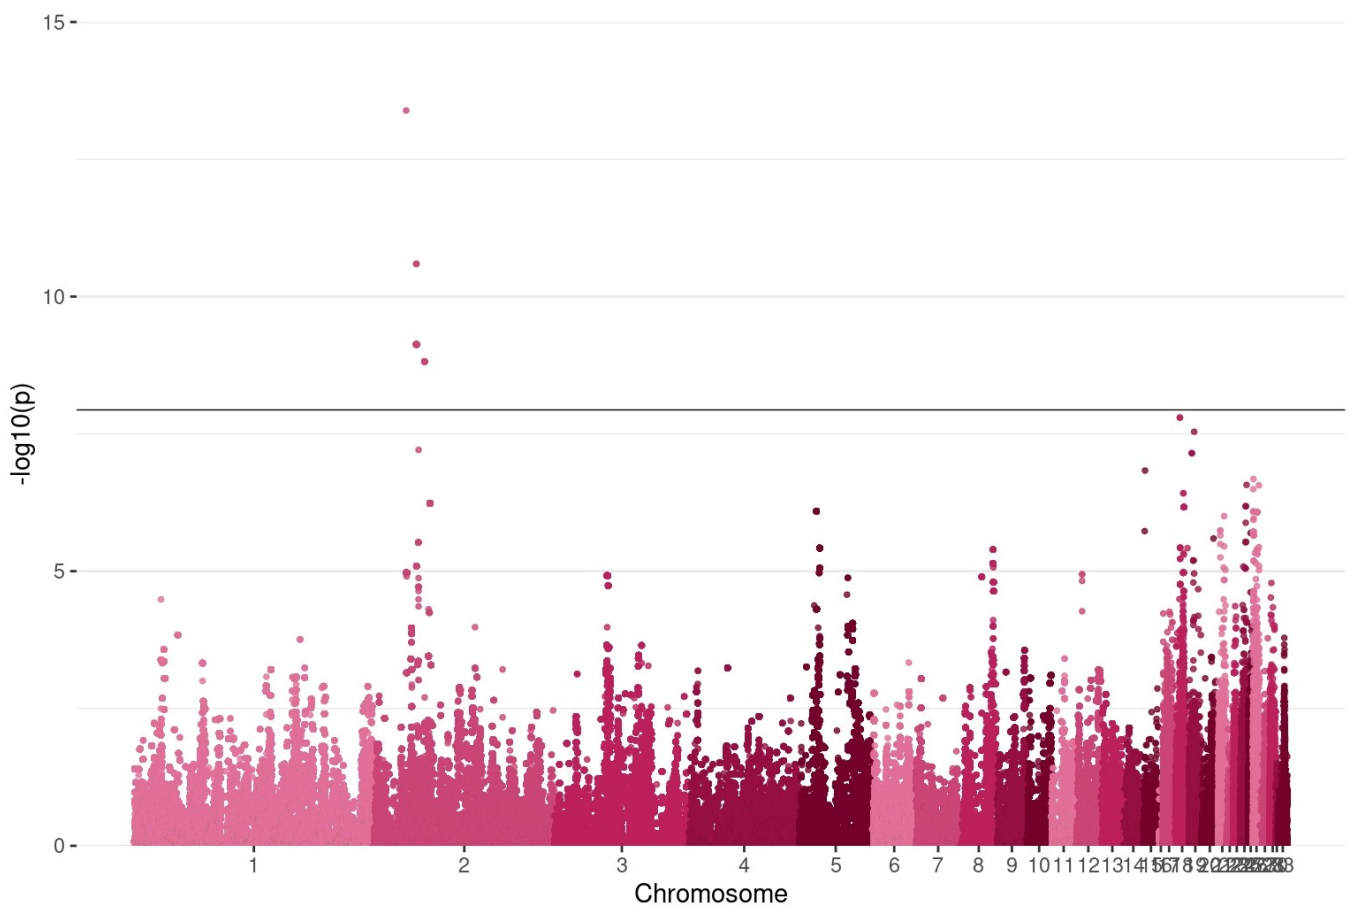

Manhattan plot of GWAS with the HS population performed with the trait FPD

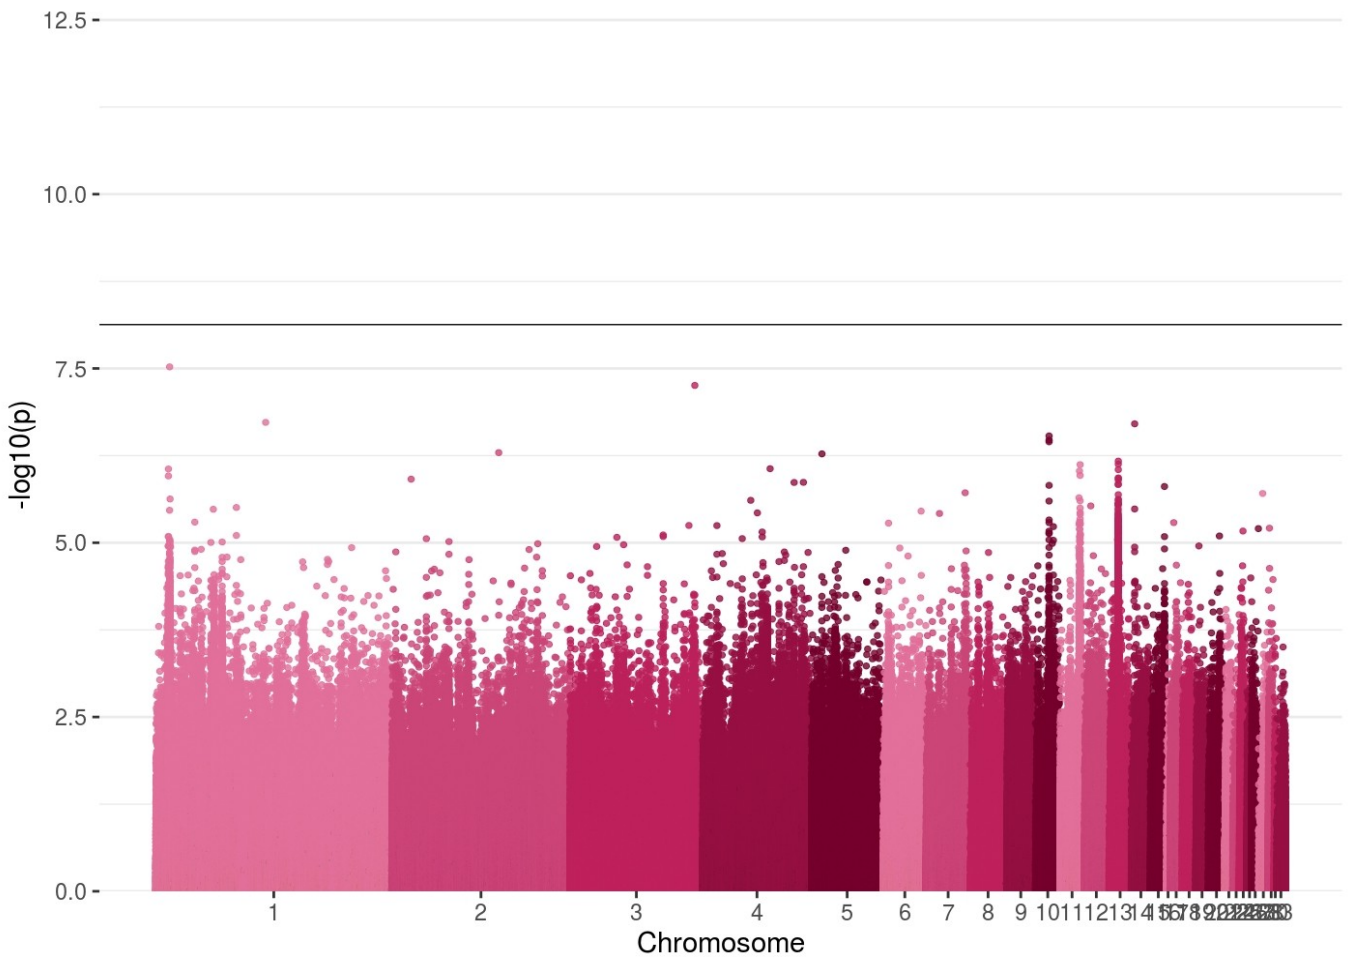

Manhattan plot of GWAS with the F2 population performed with the trait pEFP

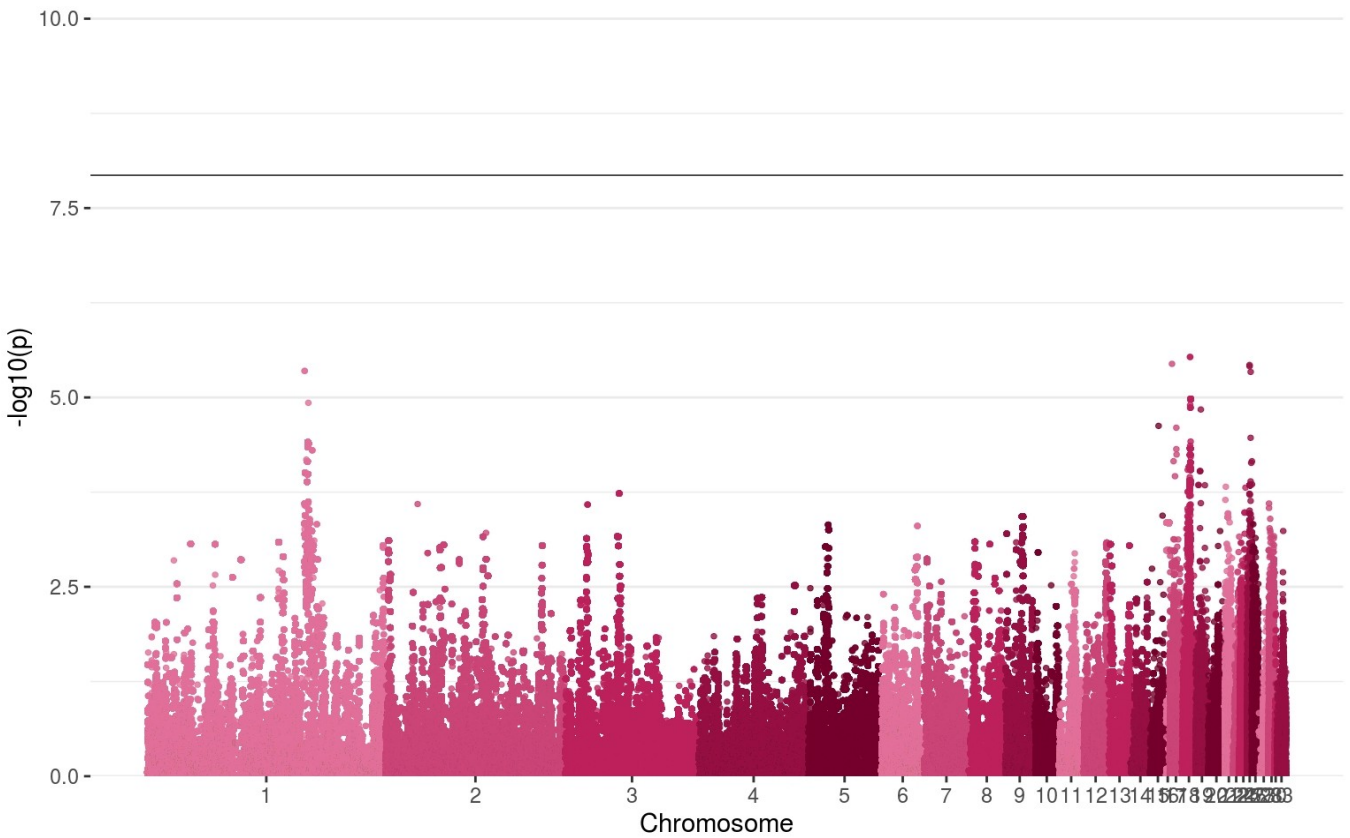

Manhattan plot of GWAS with the HS population performed with the trait pEFP
