# Supplementary material for: Meta-analyses of genome wide association studies in lines of laying hens divergently selected for feather pecking using imputed sequence level genotypes
Source: Springer Nature journal article supplement (doi:10.1186/s12863-020-00920-9), 2020-10-01

Venn diagrams of associated genes from the GWAS and meta-analyses with the traits FPD and pEFP

## FPD

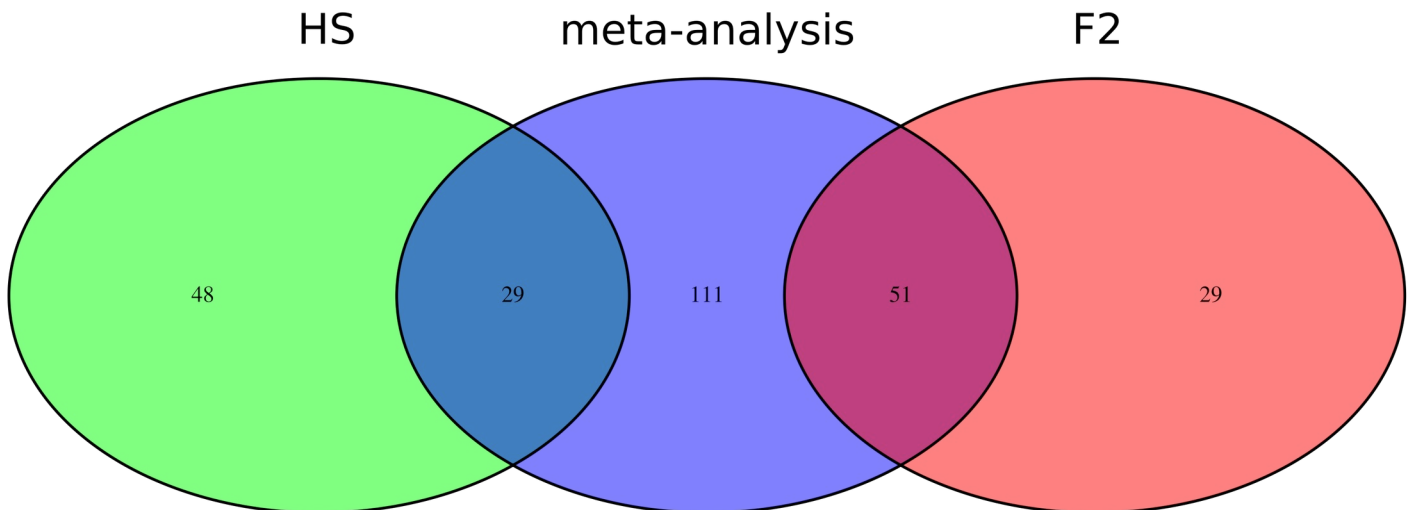

---

## pEFP

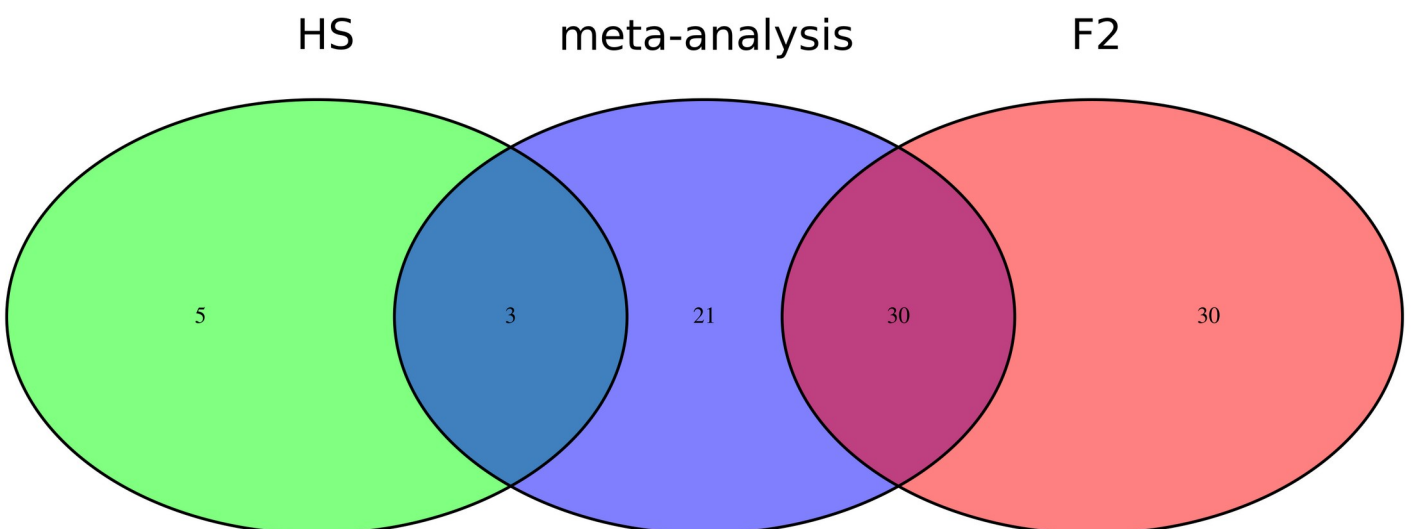

Supplement: MOESM4 [file 12863_2020_920_MOESM4_ESM.pdf]
