# Supplementary material for: Meta-analyses of genome wide association studies in lines of laying hens divergently selected for feather pecking using imputed sequence level genotypes
Source: Springer Nature journal article supplement (doi:10.1186/s12863-020-00920-9), 2020-10-01

# Protein interaction network analysis of genes associated with variants with $-\log_{10}(p) > 5$ for the phenotype FPD in the F2 resource population

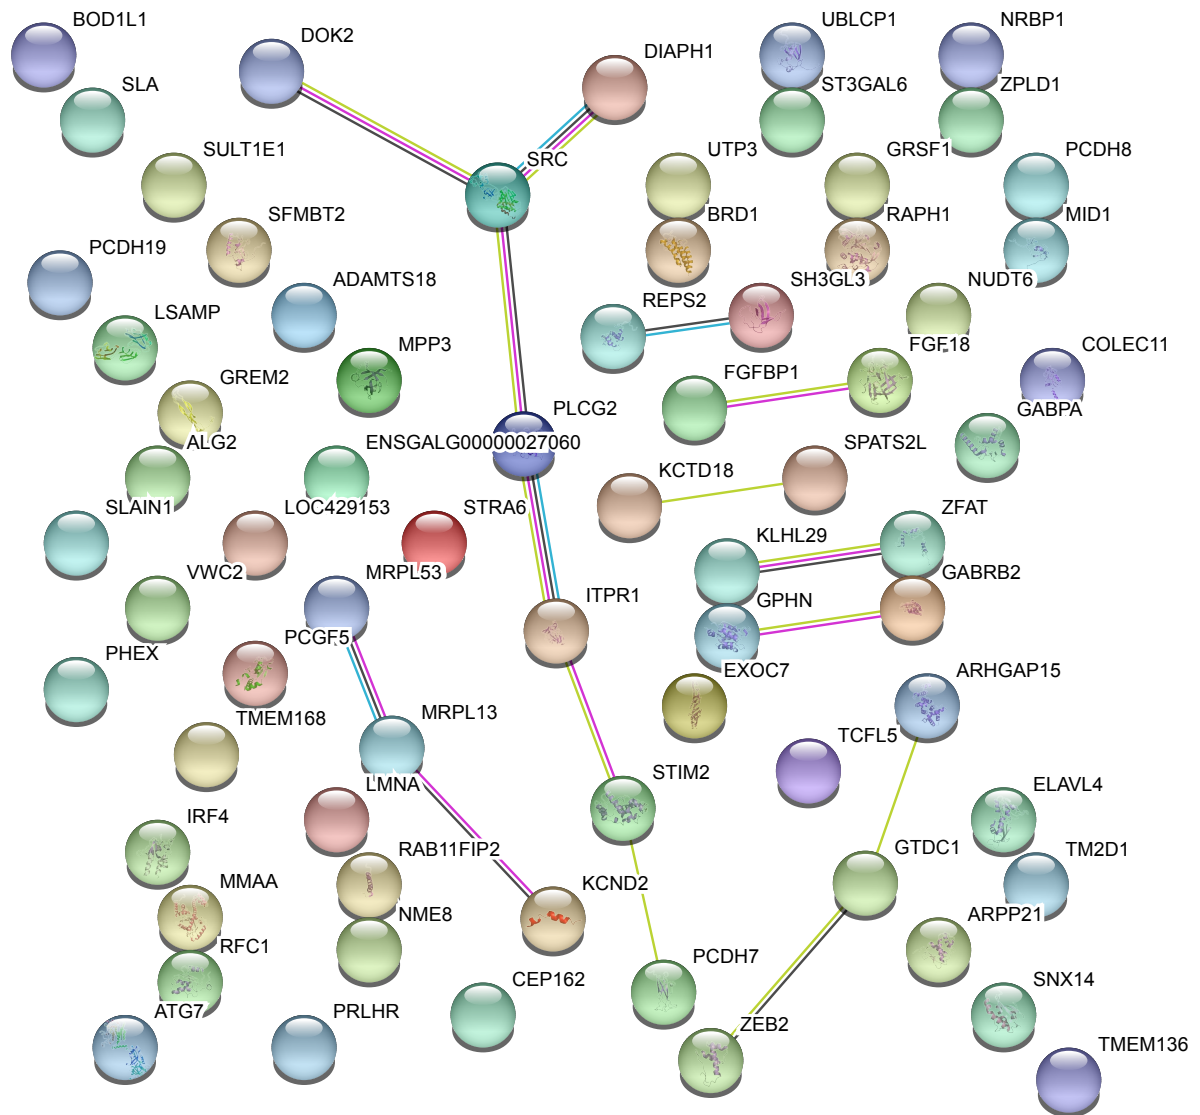

# Protein interaction network analysis of genes associated with variants with $-\log_{10}(p) > 5$ for the phenotype FPD in the HS resource population

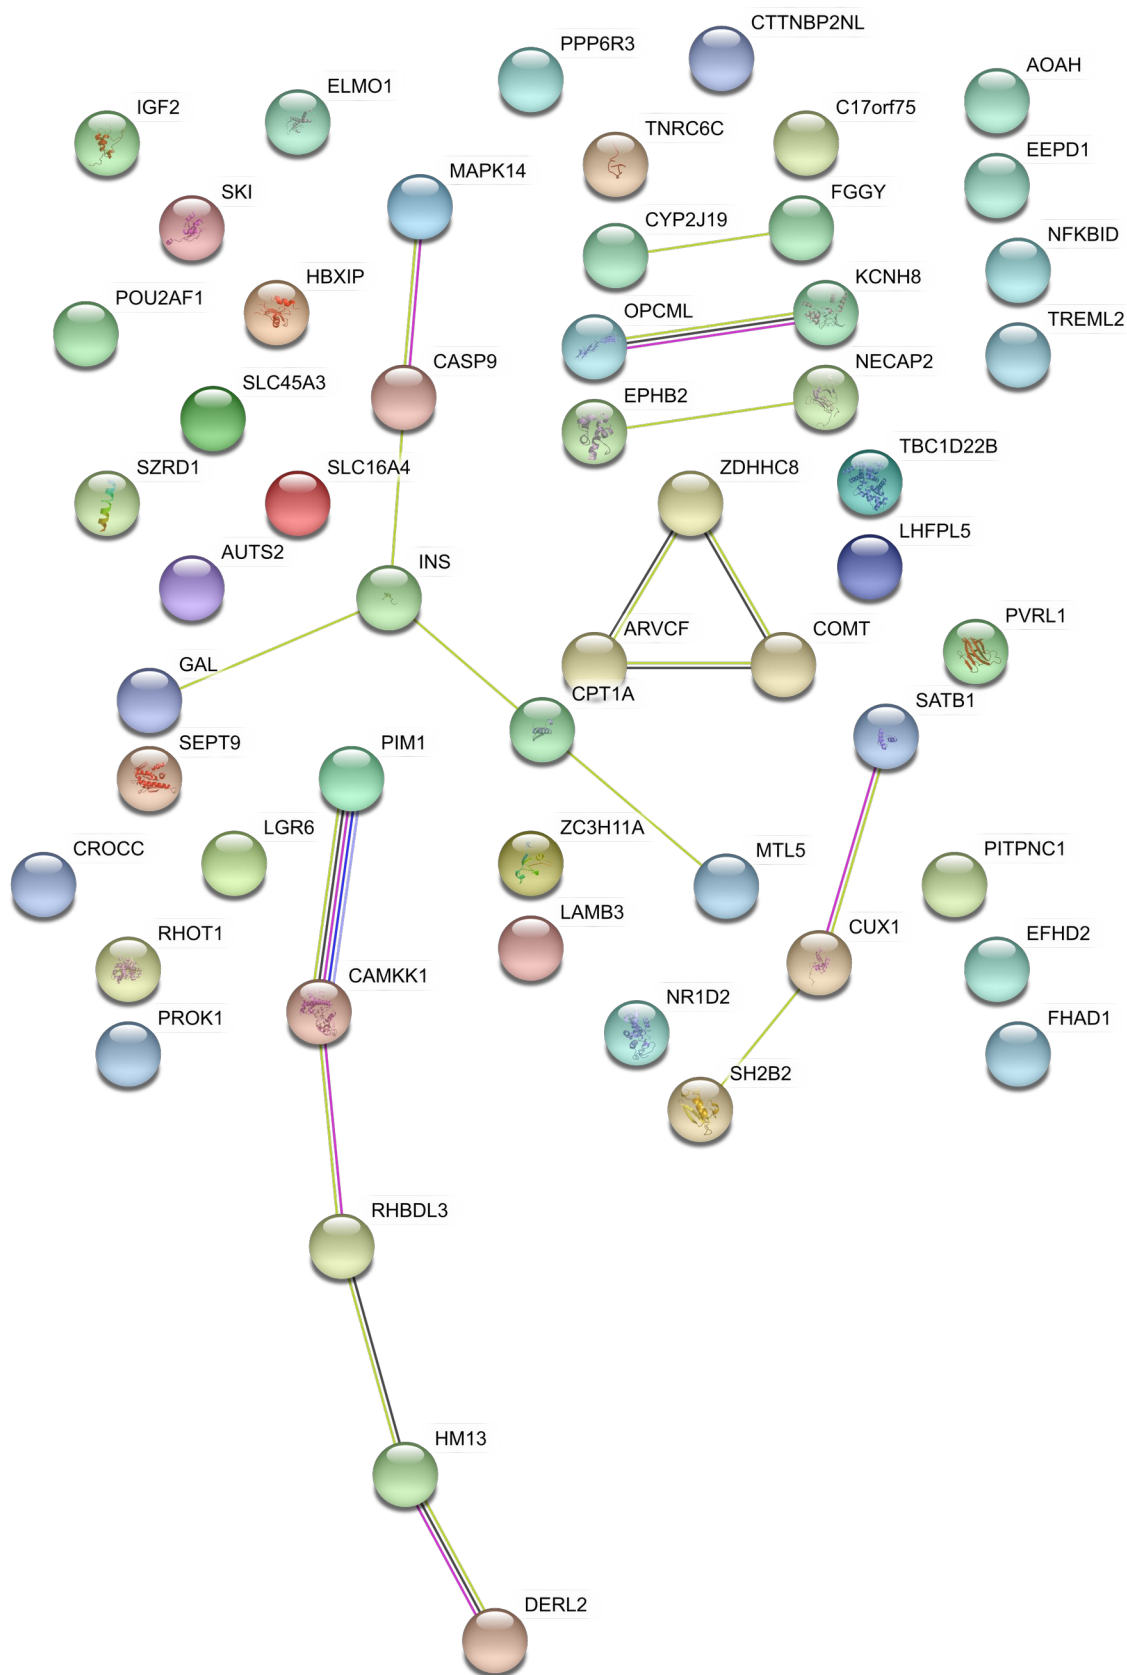

Supplement: MOESM8 [file 12863_2020_920_MOESM8_ESM.pdf]
